# Supplementary material for: Modeling of Anopheles minimus Mosquito NADPH-Cytochrome P450 Oxidoreductase (CYPOR) and Mutagenesis Analysis
Source: Int J Mol Sci. 2013 Jan 16;14(1):1788–801. doi: 10.3390/ijms14011788 (PMC3565348; doi:10.3390/ijms14011788)
Supplement: Supplementary file 1 [file ijms-14-01788-s001.pdf]

Supplementary Information

**Figure S1.** Ramachandran plot of a predicted AnCYPOR structure. The number of residues in the plot starts from Thr64 of the AnCYPOR amino acid sequence.

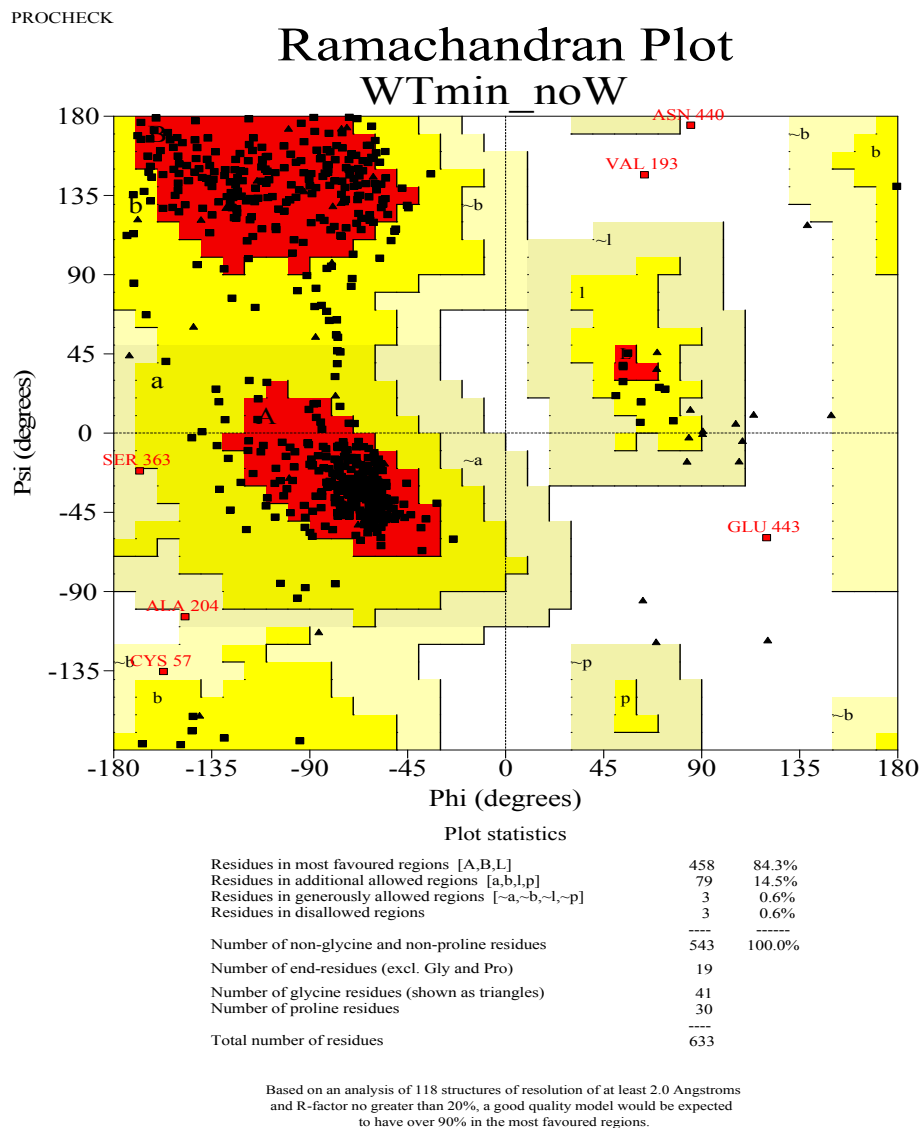

**Figure S2.** Sequence alignment of NADPH-cytochrome P450 oxidoreductases from various organisms. Amino acid sequences from CYPOR homologs of human (NCBI NP\_000932.3), rat (NP\_113764.1), fruit fly (*D. melanogaster*, NP\_477158.1), and *An. gambiae* (AAO24765.1) were aligned with *An. minimus* CYPOR (ABL75156.1) and displayed by ClustalW. The residue numbers of the sequences are shown. Identical amino acids are represented as dashes. The regions previously reported as the binding sites of the coenzymes are boxed.

|                 |                                                        |                                         |    |
|-----------------|--------------------------------------------------------|-----------------------------------------|----|
| An. minimus     | MDAQAETEMPTGSVS                                        | DEPFLGPLDIILLVCLLAGTAWYLLKGKKKENQASQFKS | 54 |
| An. gambiae     | ----T---V-A----                                        | -----V---S-----W-----S-----             | 54 |
| D. melanogaster | -ASEQTIDGAAAIP-GGG-----L--VA-AV-IG--A-F-F-RSR---EEP    | TR-                                     | 55 |
| H. sapiens      | MIN-GDSHVDTS--V-EAFAEEVSLFSMT-M-FSLIVGLLTYWF--FR---EVP |                                         | 55 |
| R. norvegicus   | -GDSH-DTSA-MPEAFAEEVSLFSTT-MV-FSLIVGVLTYWFIFRK---EIP   |                                         | 52 |

Figure S2. Cont.

|                 |                                                              |                               |     |
|-----------------|--------------------------------------------------------------|-------------------------------|-----|
| An. minimus     | YSIQPTTVNTMTMVENSFIKKLQSSGRRIVVLYGSQTGTAEFFAGRLAK            | EGIRYQMKG                     | 114 |
| An. gambiae     | -----F-----                                                  |                               | 114 |
| D. melanogaster | -----C-TSASD-----KA--S--F-----G-----RL----                   |                               | 115 |
| H. sapiens      | EFTKIQTL-SSVR-S--VE-MKKT-NII--F-----N--S-DAH--GMR--S         |                               | 114 |
| R. norvegicus   | EFSKIQTAPPVK-S--VE-MKKT-NII-F-----N--S-DAH--GMR--S           |                               | 111 |
| <b>FMN</b>      |                                                              |                               |     |
| An. minimus     | ADPEECNMEELLMLKDIDKSLAVFCLATYGE                              | GDPTDNCMEFYDWIQNNDLDMTGLNYAVF | 174 |
| An. gambiae     | -----                                                        |                               | 174 |
| D. melanogaster | -----D-----Q-----N-----A-----E--TSG-V-LS-----                |                               | 175 |
| H. sapiens      | -----YDLAD-SS-PE--NA-V--M-----AQD---L-ET-V-LS-VKF---         |                               | 174 |
| R. norvegicus   | -----YDLAD-SS-PE---V--M-----AQD---L-ET-V-L--VKF---           |                               | 171 |
| <b>FMN</b>      |                                                              |                               |     |
| An. minimus     | GLGNKTYEHYNKVGIIYVDKRLBELGANRVFELGLGDD                       | DANIEDYLITWKEKFWP             | 234 |
| An. gambiae     | -----F-----Y-                                                |                               | 234 |
| D. melanogaster | -----A-----DF---DR--A--H-                                    |                               | 235 |
| H. sapiens      | -----F-AM-K-----Q--Q-I-----G-L-EDF--R-Q--A--EH-              |                               | 234 |
| R. norvegicus   | -----F-AM-K--Q--Q--Q-I-----G-L-EDF--R-Q--A--EF-              |                               | 231 |
| <b>FMN</b>      |                                                              |                               |     |
| An. minimus     | GIESTGEDVLMRQYRLLEQPEVGADRIYTGEVARLHSLQ                      | TRPPFDKNPFLAPIKVNRE           | 294 |
| An. gambiae     | -----D-S-----                                                |                               | 294 |
| D. melanogaster | ---GG--E-I-----D-QP-----I-----I-N-----                       |                               | 295 |
| H. sapiens      | -V-A---ESSIR--ELVVHTDID-AKV-M--MG--K-YEN-K-----AVTT--K       |                               | 294 |
| R. norvegicus   | -V-A---ESSIR--ELVVHEDMDVAKV-T-MG--K-YEN-K-----AVTA--K        |                               | 291 |
| An. minimus     | LHKAGGRSCMHVEFDIEGSKMRYEAGDHLAMYPVNDRDL                      | VERLGKLCNADLETVFS             | 354 |
| An. gambiae     | -----R---E-D-----                                            |                               | 354 |
| D. melanogaster | ---G-----I-LS-----D---V--F---KS---K--Q-----D-----            |                               | 355 |
| H. sapiens      | -NQGTE-HL--L-L--SD--I--ES---V-V--A--SA--NQ--KILG---DV-M--N-L |                               | 354 |
| R. norvegicus   | -NQGTE-HL--L-L--SD--I--ES---V-V--A--SA--NQI-EILG---DVIM--N-L |                               | 351 |
| An. minimus     | DTDSSKKHPFPCPTTYRTALHYLEITALPRTHILKELAEYC                    | SEKDKFEFLRFISSTAPE            | 414 |
| An. gambiae     | -----G-----D                                                 |                               | 414 |
| D. melanogaster | -----I-----TD-E---L--SMA-IS--                                |                               | 415 |
| H. sapiens      | -EE-N-----S-----Y--D--NP---NV-Y---Q-A--PSEQ-L--KMA-SSG-      |                               | 414 |
| R. norvegicus   | -EE-N-----Y--D--NP---NV-Y---Q-A--PSEQ-H-HKMA-SSG-            |                               | 411 |
| An. minimus     | GKAKYQEWVQDSCRNVVHLEDIPSCHPPIDHVCELLPR                       | LQPRYSSISSSSKIHPTTVHY         | 474 |
| An. gambiae     | -----I-----H-----L-----                                      |                               | 474 |
| D. melanogaster | --E---S-I--A---I--I---K--R-----Y---A-L--D---                 |                               | 475 |
| H. sapiens      | --EL-LS--VEAR-HILAI-Q-CP-LR-----L-----A--Y--A---V--NS--I     |                               | 474 |
| R. norvegicus   | --EL-LS--VEAR-HILAI-Q-YP-LR-----L-----A--Y--A---V--NS--I     |                               | 471 |
| <b>FAD</b>      |                                                              |                               |     |

Figure S2. Cont.

|                 |                                                               |     |
|-----------------|---------------------------------------------------------------|-----|
| An. minimus     | TAVLVKYETKTGRLNKGVATTFLEAKHPNDGEP LPRVPIFIRKSQFRLPPKPETFVIMV  | 533 |
| An. gambiae     | -----A-----                                                   | 533 |
| D. melanogaster | ----E-K-P---I-----Y-KN-Q-QGS-EVK---V-----T-----               | 533 |
| H. sapiens      | C--V-E----A--I-----NW-RA-E-AGENGGRAL--M-V-----F-AT-----       | 534 |
| R. norvegicus   | C--A-E--A-S--V-----SW-RA-E-AGENGGRAL--M-V-----F-ST-----       | 531 |
| <b>NADPH</b>    |                                                               |     |
| An. minimus     | GPGTGLAPFRGFIQERDFSKQEGKDIGQTTLYFGCRKRSEDYIYEDELEDYSKRGIIIN L | 592 |
| An. gambiae     | -----HC-----E-----                                            | 592 |
| D. melanogaster | -----QFLRD---TV-ESI-----S---EWV-K-TL- -                       | 592 |
| H. sapiens      | -----V---I-----AWLRQQ--EV-E-L--Y---RSD---L-RE--AQFHRD-ALTQ-   | 594 |
| R. norvegicus   | -----I---M-----AWLRQQ--EV-E-L--Y---RSD---L-RE--ARFH-D-ALTQ-   | 591 |
| <b>NADPH</b>    |                                                               |     |
| An. minimus     | RVAFSRDQDKKVYVTHLLEQSDSLIWNVIGENKGHFYVCGDAKNMATDVFNILLKVIRSK  | 652 |
| An. gambiae     | -----E-----S-----I-----                                       | 652 |
| D. melanogaster | KA-----G-----Q-----A-----I-----V-----V-I-ST-                  | 652 |
| H. sapiens      | N-----E-SH---Q---K--REHL-KL- -GGA-I-----R---R--Q-TFYDIVAEL    | 653 |
| R. norvegicus   | N-----E-AH---Q---KR-REHL-KL-H-GGA-I-----R---K--Q-TFYDIVAEF    | 651 |
| <b>NADPH</b>    |                                                               |     |
| An. minimus     | GGLSETAQQYIKKMEAQKRYSAADVWS                                   | 679 |
| An. gambiae     | -----                                                         | 679 |
| D. melanogaster | -NM--AD-V-----                                                | 679 |
| H. sapiens      | -AMEHAQ-VD----LMTKG---L----                                   | 680 |
| R. norvegicus   | -PMEH-Q-VD-V--LMTKG---L----                                   | 678 |
